# Supplementary material for: Pulsed laser assisted high-throughput intracellular delivery in hanging drop based three dimensional cancer spheroids
Source: Royal Society of Chemistry journal article supplement (doi:10.1039/d0an02432e), 2021-01-01
Supplement: d0an02432e1.pdf [file d0an02432e1.pdf]

# Supplementary

## **Pulsed Laser Assisted High-Throughput Intracellular Delivery in Hanging Drop Based Three Dimensional Cancer Spheroids**

Pallavi Gupta,<sup>1</sup> Srabani Kar,<sup>2</sup> Ashish Kumar,<sup>3</sup> Fan-Gang Tseng,<sup>3</sup> Shantanu Pradhan,<sup>4\*</sup>

Pallab Sinha Mahapatra<sup>5</sup> and Tuhin Subhra Santra<sup>1\*</sup>

<sup>1</sup>Department of Engineering Design, Indian Institute of Technology Madras, Chennai 600036, India

<sup>2</sup>Department of Electrical Engineering, University of Cambridge, Cambridge CB3 0FA, UK

<sup>3</sup>Department of Engineering and System Science, National Tsing Hua University, Hsinchu 30013, Taiwan

<sup>4</sup>Department of Biotechnology, Bhupat & Jyoti Mehta School of Biosciences, Indian Institute of Technology Madras, Chennai 600036, India

<sup>5</sup>Department of Mechanical Engineering, Indian Institute of Technology Madras, Chennai 600036, India

\*Corresponding Author(s)

Corresponding author emails: Tuhin Subhra Santra (tuhin@iitm.ac.in); Shantanu Pradhan (spradhan@iitm.ac.in)

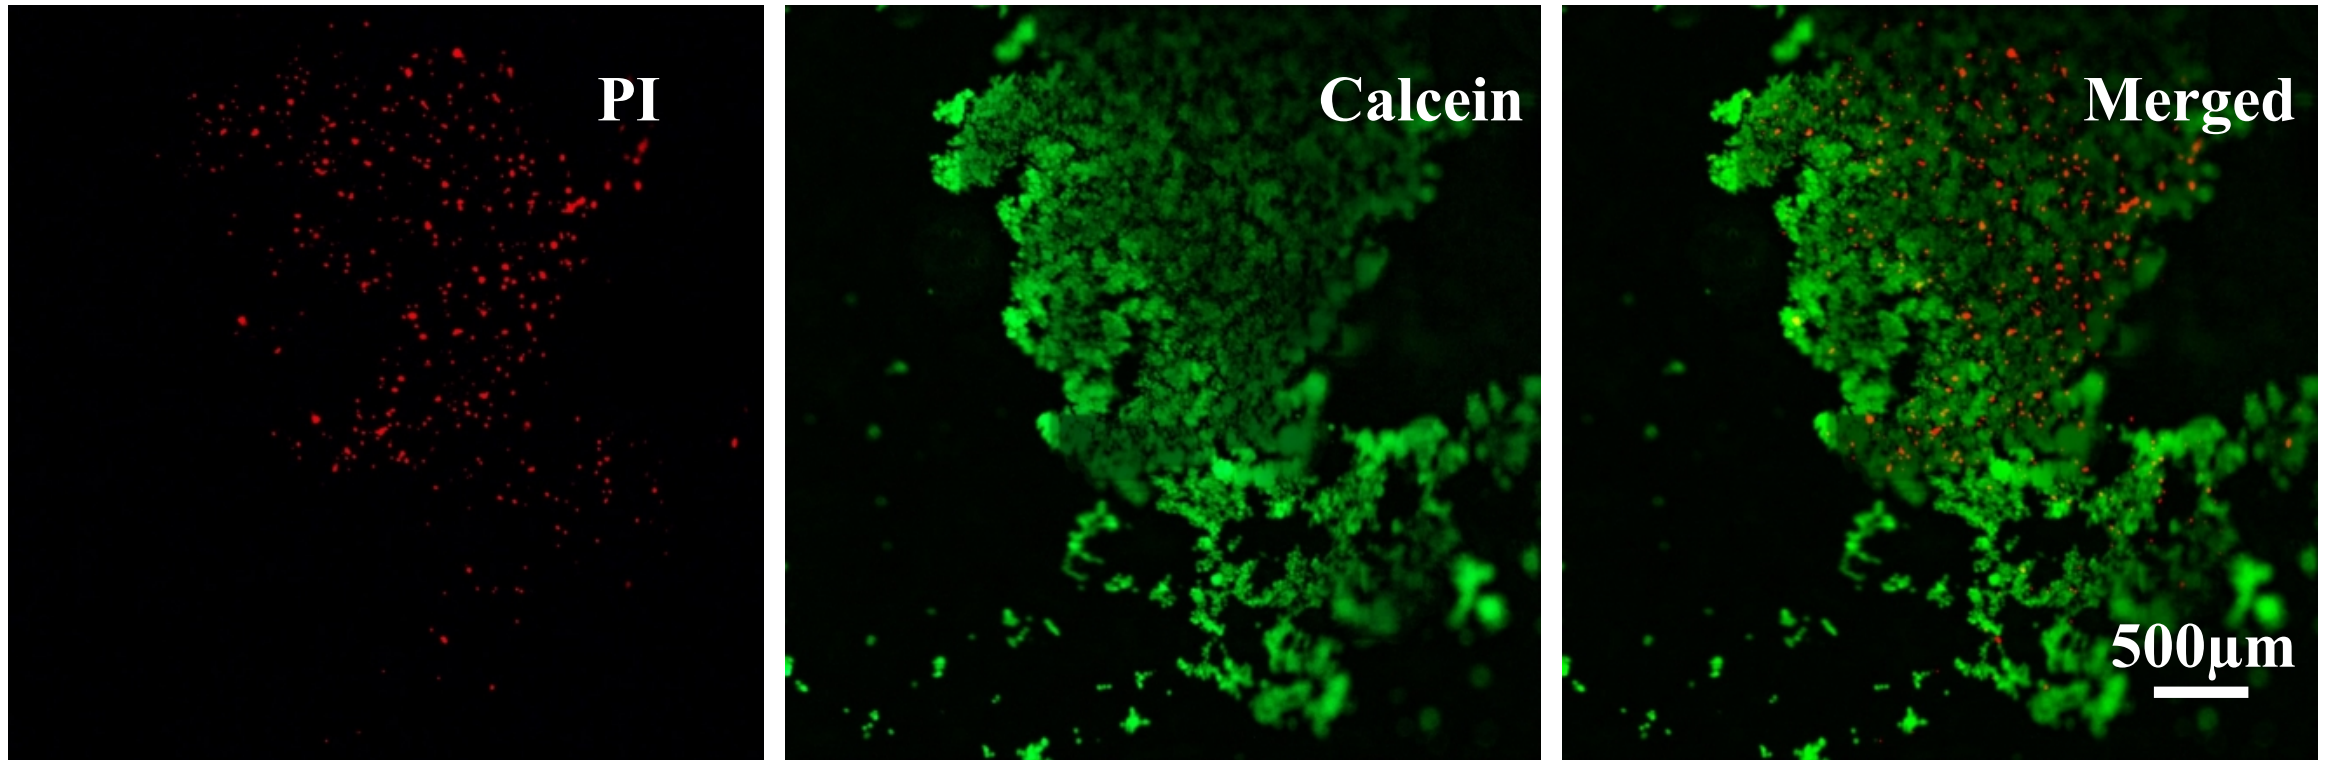

Figure S1. Optical images showing the fluorescently labelled SiHa cells with PI dye (red) and Calcein (green) dye after incubation with gold nanoparticles. PI dye stains dead cells while calcein enters in live cells. (without laser exposure) (Magnification=10X)

# Videos after optoporation (10X)

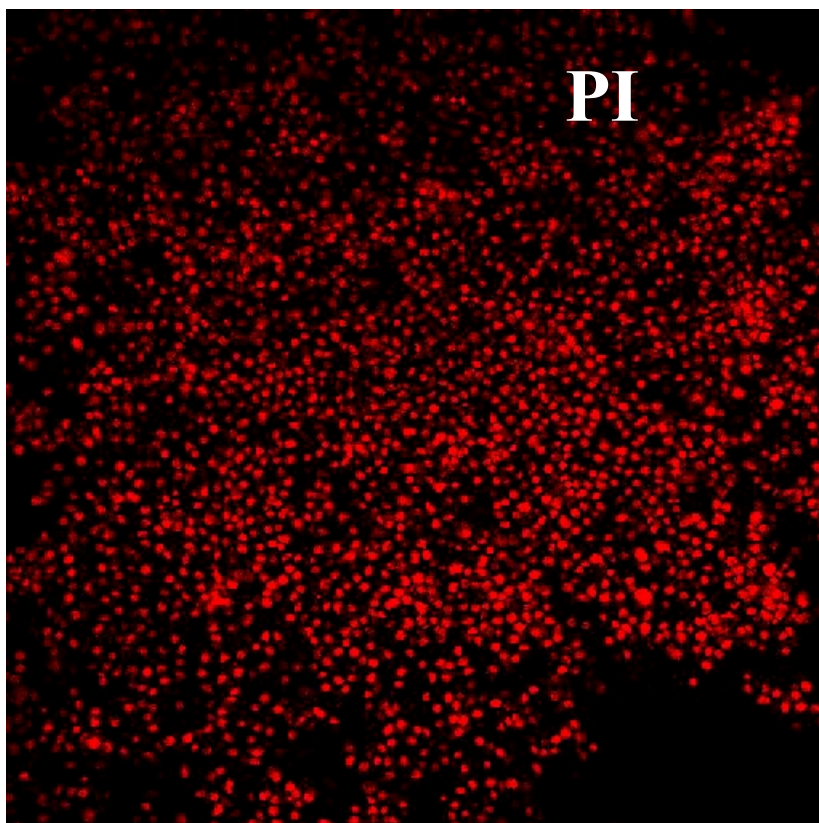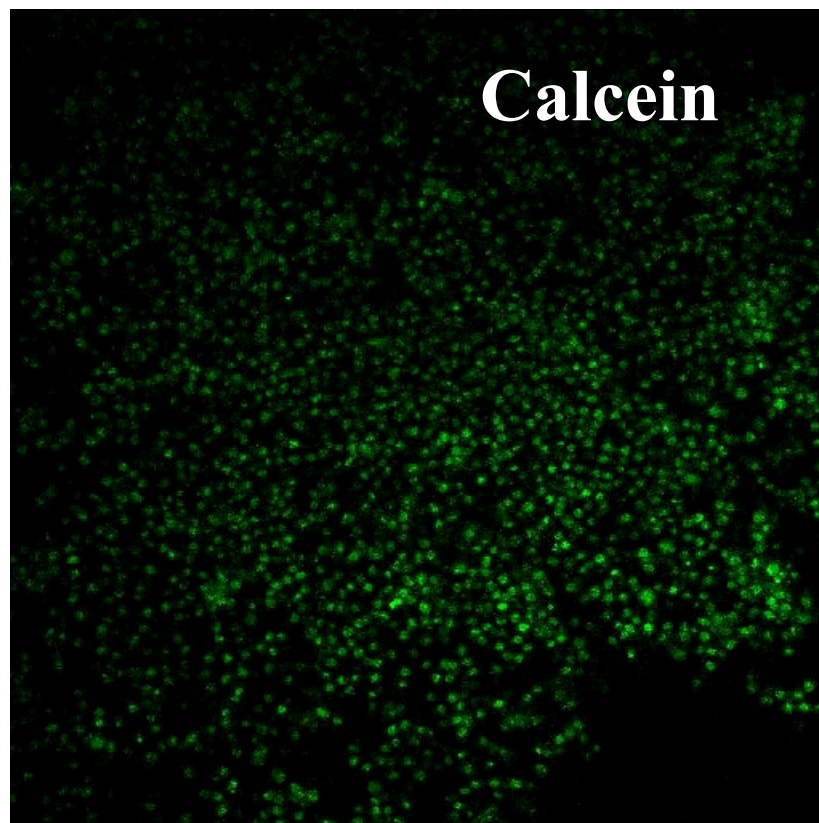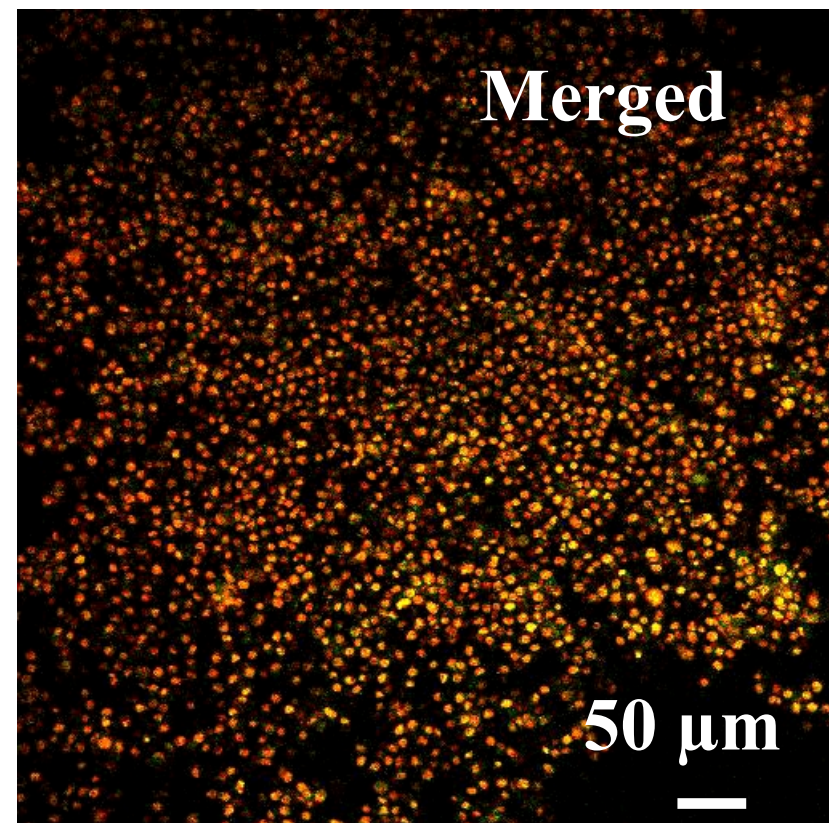

# Z-projections after optoporation (10X)

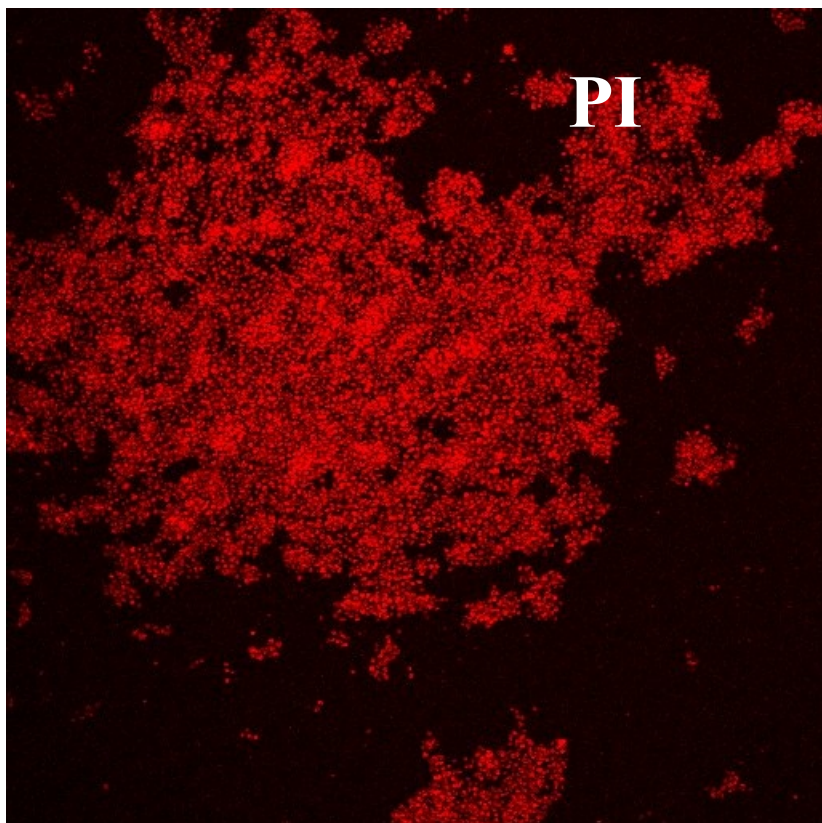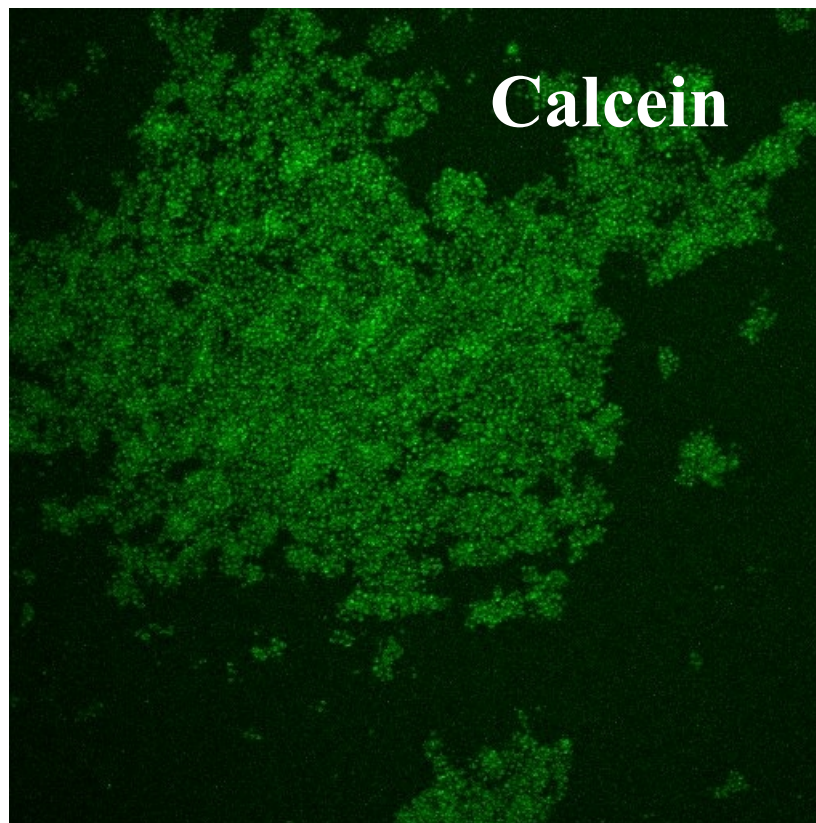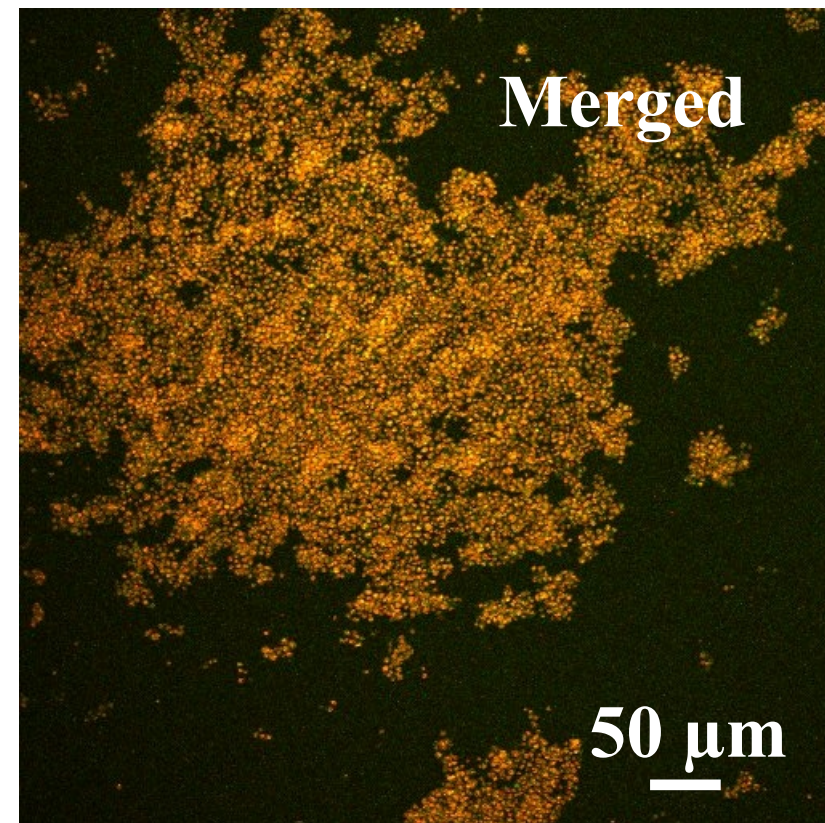

# 3D projections of optoporated spheroids (10X)

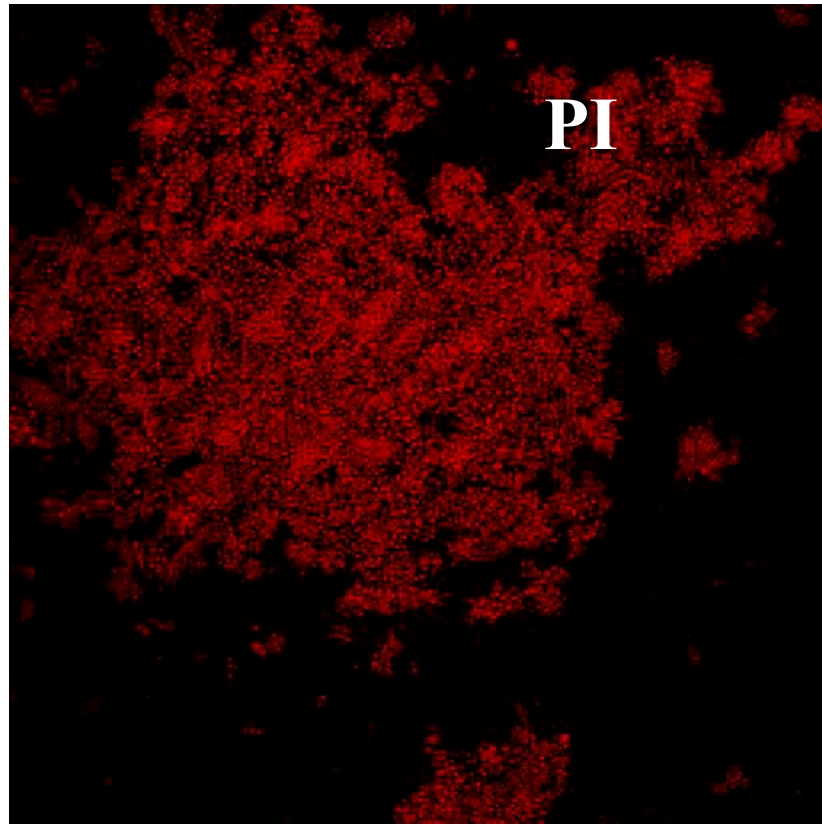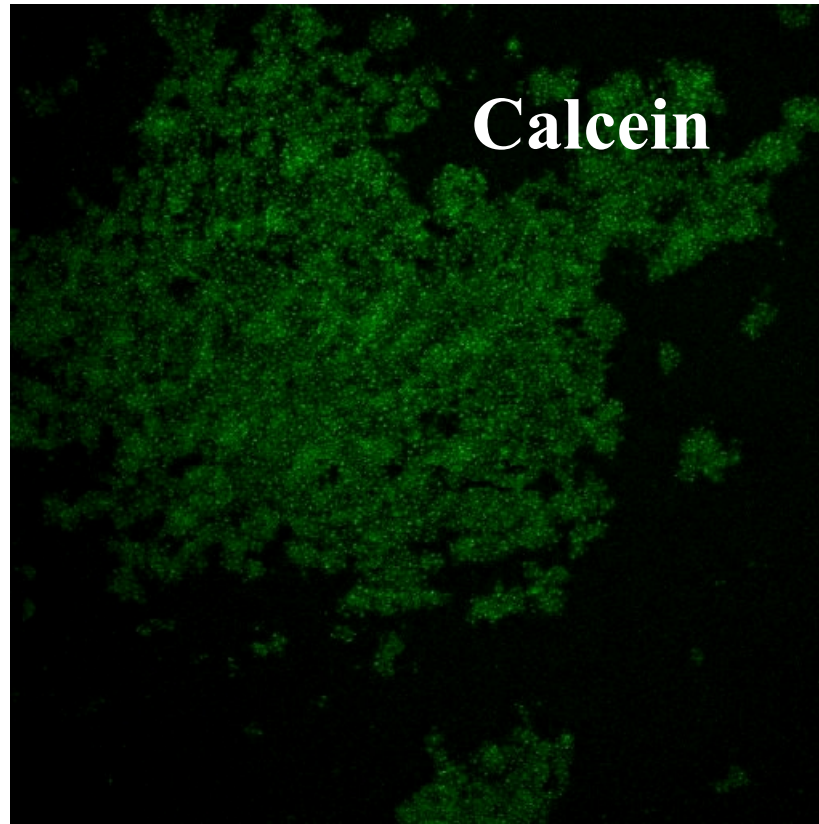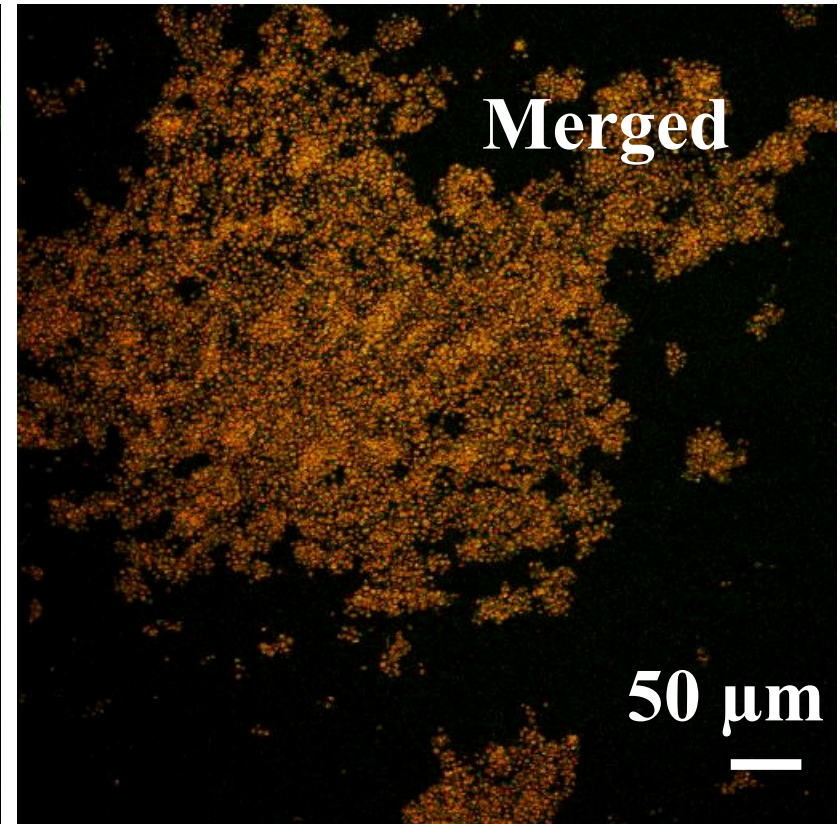

## Dextran-3000 delivery (680nm, 9mJ, 30s)

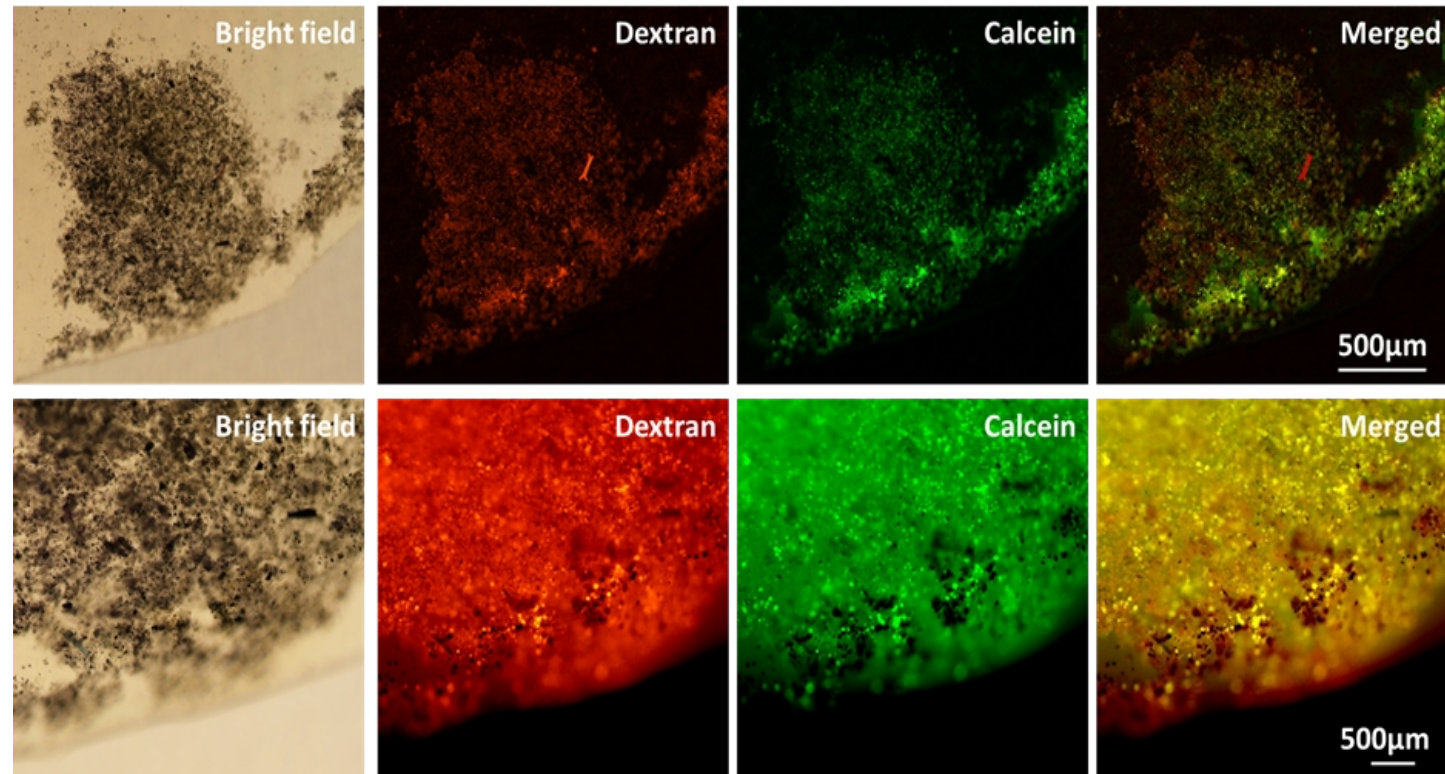

Figure S2. Demonstration of optoporation-mediated delivery of Dextran 3000 in 3D SiHa tumor spheroids. Bright field images of tumor spheroids are acquired post laser irradiation. Corresponding fluorescence images of tumor spheroids demonstrating successful delivery of Dextran dye (red) after optoporation.
